# Supplementary material for: Using Content Analysis to Characterise the Sensory Typicity and Quality Judgements of Australian Cabernet Sauvignon Wines
Source: MDPI journal article supplement (doi:10.3390/foods8120691), 2019-12-17
Supplement: s1 [file s1]

**SUPPLEMENTARY MATERIALS FOR****Using Content Analysis to Characterise the Sensory Typicity and Quality****Judgements of Australian Cabernet Sauvignon Wines**

Lira Souza Gonzaga <sup>1,2</sup>, Dimitra L. Capone <sup>1,2</sup>, Susan E. P. Bastian <sup>1,2</sup>, Lukas Danner <sup>1</sup>, David W. Jeffery <sup>1,2,\*</sup>

<sup>1</sup> Department of Wine and Food Science, The University of Adelaide, PMB 1, Glen Osmond, South Australia 5064, Australia

<sup>2</sup> Australian Research Council Training Centre for Innovative Wine Production, The University of Adelaide, PMB 1, Glen Osmond, South Australia 5064, Australia

\* Correspondence: david.jeffery@adelaide.edu.au

**Table of Contents**

Page

|                                                                                                                                                                        |            |
|------------------------------------------------------------------------------------------------------------------------------------------------------------------------|------------|
| <b>Table S1.</b> Frequencies of each category for regions and medals based on the online wine writers' reviews along with the chi-square results and <i>p</i> -values. | <b>S-2</b> |
| <b>Table S2.</b> Frequencies of each category for regions and medals based on the expert panel assessment along with the chi-square results and <i>p</i> -values.      | <b>S-4</b> |
| <b>Figure S1.</b> Multiple factor analysis plot of Cabernet Sauvignon wines with common significantly different descriptor categories based on the regional profile.   | <b>S-6</b> |

**Table S1.** Frequencies of each category for regions and medals based on the online wine writers' reviews along with the chi-square results and *p*-values (significantly different categories with  $\alpha = 0.1$  with a count of 5 or more are shown in bold). Observed values that are higher than the theoretical value are shown in red and those that are lower are shown in blue.

| Wine Reviews<br>Categories | Region        |                |               |               |                  | Medals        |               |               |               |                |                  |
|----------------------------|---------------|----------------|---------------|---------------|------------------|---------------|---------------|---------------|---------------|----------------|------------------|
|                            | Coonawarra    | Margaret River | Yarra Valley  | Chi-square    | <i>p</i> -value  | Gold          | Silver        | Bronze        | No Medal      | Chi-square     | <i>p</i> -value  |
| Dark Fruits                | <b>72.40%</b> | <b>73.21%</b>  | <b>68.48%</b> | <b>5.436</b>  | <b>0.066</b>     | <b>82.71%</b> | <b>74.57%</b> | <b>48.35%</b> | <b>33.61%</b> | <b>247.096</b> | <b>&lt;0.001</b> |
| Chemical                   | 1.50%         | 1.27%          | 1.04%         | 0.737         | 0.692            | <b>0.47%</b>  | <b>0.73%</b>  | <b>2.80%</b>  | <b>7.38%</b>  | <b>50.823</b>  | <b>&lt;0.001</b> |
| Ripe Fruits                | 23.67%        | 21.71%         | 20.79%        | 2.190         | 0.335            | <b>23.36%</b> | <b>23.15%</b> | <b>17.05%</b> | <b>18.03%</b> | <b>8.582</b>   | <b>0.035</b>     |
| Savoury                    | 16.05%        | 18.01%         | 16.74%        | 1.220         | 0.543            | <b>14.14%</b> | <b>17.52%</b> | <b>19.59%</b> | <b>22.13%</b> | <b>9.385</b>   | <b>0.025</b>     |
| Nutty                      | 0.35%         | 0.58%          | 0.92%         | 2.390         | 0.303            | 0.47%         | 0.98%         | 0.00%         | 0.00%         | 6.129          | 0.105            |
| Smoky                      | 9.24%         | 9.01%          | 9.58%         | 0.174         | 0.917            | 9.46%         | 9.62%         | 6.87%         | 12.30%        | 4.229          | 0.238            |
| Floral                     | <b>8.43%</b>  | <b>12.70%</b>  | <b>11.66%</b> | <b>8.832</b>  | <b>0.012</b>     | <b>14.84%</b> | <b>10.84%</b> | <b>5.09%</b>  | <b>3.28%</b>  | <b>34.533</b>  | <b>&lt;0.001</b> |
| Minty                      | <b>24.02%</b> | <b>8.78%</b>   | <b>12.01%</b> | <b>87.937</b> | <b>&lt;0.001</b> | <b>11.80%</b> | <b>17.36%</b> | <b>16.54%</b> | <b>7.38%</b>  | <b>18.585</b>  | <b>&lt;0.001</b> |
| Eucalyptus                 | 2.54%         | 3.12%          | 1.50%         | 4.990         | 0.082            | 1.75%         | 3.10%         | 1.78%         | 1.64%         | 5.047          | 0.168            |
| Spicy                      | 8.66%         | 8.31%          | 7.62%         | 0.644         | 0.725            | 8.76%         | 8.31%         | 7.63%         | 4.92%         | 2.293          | 0.514            |
| Leather                    | 1.96%         | 1.27%          | 0.58%         | 6.630         | 0.036            | 0.82%         | 1.63%         | 1.02%         | 1.64%         | 2.996          | 0.392            |
| Brett                      | 0.12%         | 0.23%          | 0.00%         | 2.002         | 0.367            | 0.12%         | 0.16%         | 0.00%         | 0.00%         | 0.836          | 0.841            |
| Earthy                     | <b>25.17%</b> | <b>17.78%</b>  | <b>18.48%</b> | <b>17.718</b> | <b>&lt;0.001</b> | <b>17.17%</b> | <b>22.66%</b> | <b>21.63%</b> | <b>18.03%</b> | <b>10.087</b>  | <b>0.018</b>     |
| Mineral                    | 3.58%         | 2.08%          | 2.19%         | 4.742         | 0.093            | 3.39%         | 2.69%         | 1.02%         | 1.64%         | 6.421          | 0.093            |
| Liquorice                  | 2.66%         | 1.50%          | 1.04%         | 7.056         | 0.029            | 1.75%         | 1.87%         | 1.02%         | 2.46%         | 1.705          | 0.636            |
| Oxidative                  | 0.00%         | 0.00%          | 0.46%         | 8.012         | 0.018            | 0.00%         | 0.08%         | 0.51%         | 0.82%         | 8.477          | 0.037            |
| Red Fruits                 | <b>21.02%</b> | <b>26.10%</b>  | <b>25.17%</b> | <b>6.937</b>  | <b>0.031</b>     | <b>20.68%</b> | <b>27.14%</b> | <b>24.17%</b> | <b>17.21%</b> | <b>14.844</b>  | <b>0.002</b>     |
| Herbal                     | <b>17.21%</b> | <b>19.63%</b>  | <b>21.36%</b> | <b>4.830</b>  | <b>0.089</b>     | <b>16.00%</b> | <b>19.56%</b> | <b>25.45%</b> | <b>22.13%</b> | <b>16.099</b>  | <b>0.001</b>     |
| Green                      | <b>6.70%</b>  | <b>7.39%</b>   | <b>10.85%</b> | <b>11.270</b> | <b>0.004</b>     | <b>3.74%</b>  | <b>6.85%</b>  | <b>17.56%</b> | <b>25.41%</b> | <b>117.804</b> | <b>&lt;0.001</b> |
| Oaky                       | <b>66.28%</b> | <b>67.90%</b>  | <b>60.28%</b> | <b>12.248</b> | <b>0.002</b>     | <b>77.80%</b> | <b>64.79%</b> | <b>44.53%</b> | <b>39.34%</b> | <b>168.956</b> | <b>&lt;0.001</b> |
| Peppery                    | 3.00%         | 1.85%          | 1.15%         | 7.692         | 0.021            | 1.52%         | 2.12%         | 2.54%         | 2.46%         | 1.825          | 0.610            |
| Confectionery              | 0.23%         | 0.58%          | 0.69%         | 2.010         | 0.366            | 0.12%         | 0.65%         | 0.51%         | 1.64%         | 6.275          | 0.099            |
| Cooked Vegetables          | 0.23%         | 0.81%          | 1.39%         | 7.201         | 0.027            | 0.58%         | 0.65%         | 1.53%         | 1.64%         | 4.491          | 0.213            |
| Sweetness                  | <b>12.24%</b> | <b>9.01%</b>   | <b>10.16%</b> | <b>4.961</b>  | <b>0.084</b>     | <b>7.59%</b>  | <b>11.57%</b> | <b>12.98%</b> | <b>11.48%</b> | <b>11.916</b>  | <b>0.008</b>     |
| Leafy                      | <b>10.05%</b> | <b>15.94%</b>  | <b>11.89%</b> | <b>14.243</b> | <b>0.001</b>     | 12.27%        | 13.37%        | 12.21%        | 9.02%         | 2.211          | 0.530            |
| Citric                     | 0.46%         | 0.12%          | 0.46%         | 2.007         | 0.367            | 0.23%         | 0.33%         | 0.51%         | 0.82%         | 1.422          | 0.700            |
| Violets                    | 7.74%         | 9.82%          | 9.24%         | 2.452         | 0.294            | <b>13.20%</b> | <b>7.91%</b>  | <b>4.33%</b>  | <b>4.10%</b>  | <b>34.53</b>   | <b>&lt;0.001</b> |

**Table S1. contd.**

| Wine Reviews<br>Categories | Region        |                |               |               |                  | Medals        |               |               |               |               |                  |
|----------------------------|---------------|----------------|---------------|---------------|------------------|---------------|---------------|---------------|---------------|---------------|------------------|
|                            | Coonawarra    | Margaret River | Yarra Valley  | Chi-square    | p-value          | Gold          | Silver        | Bronze        | No Medal      | Chi-square    | p-value          |
| Olives                     | <b>7.62%</b>  | <b>9.82%</b>   | <b>5.89%</b>  | <b>9.351</b>  | <b>0.009</b>     | <b>10.63%</b> | <b>7.66%</b>  | <b>3.82%</b>  | <b>1.64%</b>  | <b>24.75</b>  | <b>&lt;0.001</b> |
| Yeasty                     | 3.93%         | 4.16%          | 4.16%         | 0.079         | 0.961            | 5.37%         | 3.50%         | 3.31%         | 3.28%         | 5.499         | 0.139            |
| Apples                     | 0.35%         | 0.00%          | 0.00%         | 6.007         | 0.05             | 0.23%         | 0.08%         | 0.00%         | 0.00%         | 1.755         | 0.625            |
| Varietal                   | 8.78%         | 9.58%          | 10.16%        | 0.975         | 0.614            | 9.11%         | 10.02%        | 10.18%        | 4.92%         | 3.729         | 0.292            |
| Soft                       | <b>18.59%</b> | <b>23.44%</b>  | <b>22.86%</b> | <b>7.170</b>  | <b>0.028</b>     | <b>21.14%</b> | <b>23.47%</b> | <b>19.85%</b> | <b>12.30%</b> | <b>9.582</b>  | <b>0.022</b>     |
| High Acidity               | 2.54%         | 2.31%          | 3.70%         | 3.450         | 0.178            | <b>1.52%</b>  | <b>2.77%</b>  | <b>4.58%</b>  | <b>7.38%</b>  | <b>18.797</b> | <b>&lt;0.001</b> |
| Fine                       | 20.90%        | 21.71%         | 24.36%        | 3.281         | 0.194            | <b>27.69%</b> | <b>24.21%</b> | <b>9.92%</b>  | <b>5.74%</b>  | <b>70.905</b> | <b>&lt;0.001</b> |
| Hotness                    | 1.85%         | 0.46%          | 1.27%         | 7.117         | 0.028            | 0.93%         | 1.55%         | 0.76%         | 0.82%         | 2.56          | 0.465            |
| Short                      | 1.27%         | 0.92%          | 1.73%         | 2.205         | 0.332            | <b>0.47%</b>  | <b>0.90%</b>  | <b>3.05%</b>  | <b>5.74%</b>  | <b>34.098</b> | <b>&lt;0.001</b> |
| Long                       | 5.77%         | 7.39%          | 5.89%         | 2.369         | 0.306            | <b>7.71%</b>  | <b>6.85%</b>  | <b>3.31%</b>  | <b>1.64%</b>  | <b>13.837</b> | <b>0.003</b>     |
| Complexity                 | <b>10.97%</b> | <b>13.51%</b>  | <b>9.93%</b>  | <b>5.784</b>  | <b>0.055</b>     | <b>16.24%</b> | <b>11.74%</b> | <b>3.31%</b>  | <b>1.64%</b>  | <b>56.645</b> | <b>&lt;0.001</b> |
| Medium Body                | <b>18.94%</b> | <b>22.63%</b>  | <b>24.83%</b> | <b>8.903</b>  | <b>0.012</b>     | <b>21.14%</b> | <b>24.94%</b> | <b>20.36%</b> | <b>6.56%</b>  | <b>23.984</b> | <b>&lt;0.001</b> |
| Firm                       | <b>13.28%</b> | <b>15.24%</b>  | <b>10.05%</b> | <b>10.644</b> | <b>0.005</b>     | <b>11.80%</b> | <b>14.83%</b> | <b>11.20%</b> | <b>5.74%</b>  | <b>11.618</b> | <b>0.009</b>     |
| Grainy                     | 12.47%        | 13.16%         | 12.01%        | 0.533         | 0.766            | <b>14.37%</b> | <b>14.18%</b> | <b>6.62%</b>  | <b>2.46%</b>  | <b>29.488</b> | <b>&lt;0.001</b> |
| Astringency                | <b>9.82%</b>  | <b>6.00%</b>   | <b>7.39%</b>  | <b>9.027</b>  | <b>0.011</b>     | <b>5.49%</b>  | <b>7.74%</b>  | <b>11.20%</b> | <b>12.30%</b> | <b>16.189</b> | <b>0.001</b>     |
| Balanced                   | 7.04%         | 7.27%          | 5.20%         | 3.696         | 0.158            | <b>6.66%</b>  | <b>7.58%</b>  | <b>4.33%</b>  | <b>1.64%</b>  | <b>10.18</b>  | <b>0.017</b>     |
| Grippy                     | 3.58%         | 2.66%          | 2.42%         | 2.307         | 0.316            | 0.93%         | 3.59%         | 4.33%         | 4.92%         | 18.474        | <0.001           |
| Chewy                      | 2.66%         | 0.92%          | 0.81%         | 12.872        | 0.002            | 0.47%         | 2.04%         | 1.53%         | 2.46%         | 9.549         | 0.023            |
| Bitterness                 | 2.08%         | 1.50%          | 1.96%         | 0.891         | 0.640            | 0.58%         | 1.87%         | 3.56%         | 4.92%         | 20.255        | <0.001           |
| Full Body                  | <b>13.16%</b> | <b>13.39%</b>  | <b>6.35%</b>  | <b>28.400</b> | <b>&lt;0.001</b> | <b>13.67%</b> | <b>11.82%</b> | <b>5.34%</b>  | <b>1.64%</b>  | <b>30.897</b> | <b>&lt;0.001</b> |

**Table S2.** Frequencies of each category for regions and medals based on the expert panel assessment along with the chi-square results and *p*-values (significantly different categories with  $\alpha = 0.1$  with a count of 5 or more are shown in bold). Observed values that are higher than the theoretical value are shown in red and those that are lower are shown in blue.

| Expert Panel<br>Categories | Regions       |               |                |               |               |                  | Medals        |               |               |               |               |                  |
|----------------------------|---------------|---------------|----------------|---------------|---------------|------------------|---------------|---------------|---------------|---------------|---------------|------------------|
|                            | Bordeaux      | Coonawarra    | Margaret River | Yarra Valley  | Chi-square    | <i>p</i> -value  | Gold          | Silver        | Bronze        | No Medal      | Chi-square    | <i>p</i> -value  |
| Dark Fruits                | 37.27%        | 39.49%        | 30.45%         | 36.82%        | 5.034         | 0.169            | <b>49.06%</b> | <b>49.10%</b> | <b>34.87%</b> | <b>26.59%</b> | <b>36.745</b> | <b>&lt;0.001</b> |
| Chemical                   | 4.55%         | 6.58%         | 5.91%          | 8.64%         | 2.375         | 0.498            | 5.66%         | 7.53%         | 7.66%         | 5.74%         | 1.231         | 0.746            |
| Ripe Fruits                | <b>18.18%</b> | <b>30.13%</b> | <b>15.91%</b>  | <b>27.27%</b> | <b>18.657</b> | <b>&lt;0.001</b> | <b>41.51%</b> | <b>21.86%</b> | <b>23.37%</b> | <b>25.08%</b> | <b>9.557</b>  | <b>0.023</b>     |
| Savoury                    | <b>46.36%</b> | <b>18.73%</b> | <b>27.73%</b>  | <b>25.00%</b> | <b>35.323</b> | <b>&lt;0.001</b> | 32.08%        | 28.67%        | 26.44%        | 21.45%        | 5.631         | 0.131            |
| Nutty                      | 5.45%         | 4.05%         | 5.00%          | 4.55%         | 0.537         | 0.911            | <b>0.00%</b>  | <b>5.02%</b>  | <b>2.68%</b>  | <b>6.65%</b>  | <b>7.920</b>  | <b>0.048</b>     |
| Smoky                      | 0.91%         | 1.01%         | 0.91%          | 1.36%         | 0.274         | 0.965            | 3.77%         | 0.36%         | 0.38%         | 1.81%         | 7.793         | 0.050            |
| Floral                     | <b>5.45%</b>  | <b>7.59%</b>  | <b>11.82%</b>  | <b>5.91%</b>  | <b>6.765</b>  | <b>0.080</b>     | <b>18.87%</b> | <b>9.68%</b>  | <b>9.20%</b>  | <b>3.93%</b>  | <b>17.52</b>  | <b>0.001</b>     |
| Minty                      | <b>6.36%</b>  | <b>17.22%</b> | <b>19.09%</b>  | <b>10.00%</b> | <b>15.340</b> | <b>0.002</b>     | <b>16.98%</b> | <b>16.13%</b> | <b>18.39%</b> | <b>11.18%</b> | <b>6.571</b>  | <b>0.087</b>     |
| Eucalyptus                 | 0.91%         | 1.52%         | 2.27%          | 1.82%         | 0.943         | 0.815            | 1.89%         | 1.08%         | 3.45%         | 0.91%         | 6.559         | 0.087            |
| Spicy                      | 11.82%        | 13.92%        | 10.00%         | 14.09%        | 2.415         | 0.491            | 9.43%         | 14.34%        | 12.26%        | 12.69%        | 1.189         | 0.756            |
| Leather                    | <b>17.27%</b> | <b>6.58%</b>  | <b>4.55%</b>   | <b>10.45%</b> | <b>18.675</b> | <b>&lt;0.001</b> | <b>24.53%</b> | <b>7.17%</b>  | <b>4.21%</b>  | <b>10.27%</b> | <b>25.799</b> | <b>&lt;0.001</b> |
| Brett                      | <b>14.55%</b> | <b>0.76%</b>  | <b>0.91%</b>   | <b>1.36%</b>  | <b>72.707</b> | <b>&lt;0.001</b> | <b>0.00%</b>  | <b>0.00%</b>  | <b>1.15%</b>  | <b>5.74%</b>  | <b>25.871</b> | <b>&lt;0.001</b> |
| Earthy                     | 20.00%        | 19.24%        | 12.73%         | 20.00%        | 5.452         | 0.142            | <b>39.62%</b> | <b>17.56%</b> | <b>10.73%</b> | <b>21.45%</b> | <b>28.436</b> | <b>&lt;0.001</b> |
| Mineral                    | <b>8.18%</b>  | <b>1.27%</b>  | <b>1.82%</b>   | <b>1.36%</b>  | <b>20.555</b> | <b>&lt;0.001</b> | <b>7.55%</b>  | <b>3.94%</b>  | <b>1.53%</b>  | <b>0.60%</b>  | <b>14.934</b> | <b>0.002</b>     |
| Liquorice                  | 0.91%         | 1.77%         | 0.91%          | 3.64%         | 5.319         | 0.150            | <b>5.66%</b>  | <b>3.23%</b>  | <b>0.77%</b>  | <b>1.21%</b>  | <b>9.065</b>  | <b>0.028</b>     |
| Oxidative                  | 2.73%         | 2.53%         | 3.64%          | 1.82%         | 1.446         | 0.695            | 1.89%         | 2.15%         | 2.30%         | 3.32%         | 1.107         | 0.775            |
| Red Fruits                 | 47.27%        | 47.59%        | 46.36%         | 44.09%        | 0.731         | 0.866            | <b>30.19%</b> | <b>48.03%</b> | <b>49.43%</b> | <b>43.20%</b> | <b>8.041</b>  | <b>0.045</b>     |
| Herbal                     | 9.09%         | 12.91%        | 14.09%         | 12.73%        | 1.692         | 0.639            | <b>11.32%</b> | <b>14.70%</b> | <b>16.48%</b> | <b>7.85%</b>  | <b>11.552</b> | <b>0.009</b>     |
| Green                      | 17.27%        | 18.23%        | 19.55%         | 15.00%        | 1.706         | 0.636            | <b>11.32%</b> | <b>10.75%</b> | <b>18.39%</b> | <b>23.26%</b> | <b>18.015</b> | <b>&lt;0.001</b> |
| Oaky                       | 40.00%        | 39.24%        | 32.27%         | 43.64%        | 6.216         | 0.102            | <b>58.49%</b> | <b>41.22%</b> | <b>39.85%</b> | <b>34.44%</b> | <b>11.908</b> | <b>0.008</b>     |
| Peppery                    | 2.73%         | 3.54%         | 2.27%          | 4.55%         | 1.914         | 0.591            | 0.00%         | 1.79%         | 4.60%         | 4.53%         | 6.367         | 0.095            |
| Confectionery              | 5.45%         | 3.54%         | 5.45%          | 5.45%         | 1.890         | 0.596            | 0.00%         | 5.38%         | 3.83%         | 5.74%         | 4.079         | 0.253            |
| Cooked Vegetables          | 4.55%         | 7.85%         | 6.82%          | 10.45%        | 4.056         | 0.255            | 1.89%         | 7.89%         | 7.66%         | 8.76%         | 3.015         | 0.389            |
| Sweetness                  | 9.09%         | 16.20%        | 12.27%         | 14.55%        | 4.369         | 0.224            | 15.09%        | 12.90%        | 14.18%        | 14.80%        | 0.510         | 0.917            |
| Leafy                      | 10.91%        | 12.41%        | 12.73%         | 10.91%        | 0.544         | 0.909            | 20.75%        | 11.11%        | 14.18%        | 10.27%        | 6.017         | 0.111            |
| Citric                     | 0.00%         | 2.78%         | 3.64%          | 2.27%         | 4.095         | 0.251            | 1.89%         | 3.94%         | 3.83%         | 0.60%         | 8.870         | 0.031            |
| Violets                    | 0.91%         | 5.57%         | 5.00%          | 4.09%         | 4.512         | 0.211            | <b>3.77%</b>  | <b>8.24%</b>  | <b>4.60%</b>  | <b>1.81%</b>  | <b>14.219</b> | <b>0.003</b>     |

Table S2. contd.

| Expert Panel<br>Categories | Regions  |            |                |              |            |         | Medals |        |        |          |            |         |
|----------------------------|----------|------------|----------------|--------------|------------|---------|--------|--------|--------|----------|------------|---------|
|                            | Bordeaux | Coonawarra | Margaret River | Yarra Valley | Chi-square | p-value | Gold   | Silver | Bronze | No Medal | Chi-square | p-value |
| Olives                     | 0.00%    | 3.80%      | 2.73%          | 4.09%        | 4.849      | 0.183   | 3.77%  | 6.09%  | 3.07%  | 0.91%    | 13.042     | 0.005   |
| Yeasty                     | 6.36%    | 2.53%      | 3.18%          | 3.64%        | 3.933      | 0.269   | 0.00%  | 6.45%  | 1.92%  | 2.72%    | 11.772     | 0.008   |
| Apples                     | 3.64%    | 2.53%      | 2.73%          | 3.64%        | 0.819      | 0.845   | 0.00%  | 2.51%  | 4.60%  | 2.72%    | 4.206      | 0.240   |
| Varietal                   | 0.00%    | 3.80%      | 1.82%          | 2.27%        | 5.917      | 0.116   | 5.66%  | 2.51%  | 2.68%  | 2.11%    | 2.286      | 0.515   |
| Soft                       | 24.55%   | 19.75%     | 28.18%         | 16.36%       | 10.589     | 0.014   | 26.42% | 20.79% | 20.69% | 21.75%   | 0.956      | 0.812   |
| High Acidity               | 19.09%   | 17.97%     | 10.45%         | 19.55%       | 8.354      | 0.039   | 5.66%  | 13.98% | 18.01% | 19.03%   | 7.797      | 0.050   |
| Fine                       | 12.73%   | 9.87%      | 10.91%         | 6.36%        | 4.350      | 0.226   | 3.77%  | 15.05% | 10.73% | 5.74%    | 17.237     | 0.001   |
| Hotness                    | 5.45%    | 6.33%      | 5.91%          | 6.82%        | 0.288      | 0.962   | 9.43%  | 5.38%  | 7.28%  | 5.74%    | 1.891      | 0.595   |
| Short                      | 7.27%    | 5.06%      | 4.55%          | 4.09%        | 1.685      | 0.640   | 1.89%  | 2.51%  | 2.68%  | 9.67%    | 22.478     | <0.001  |
| Long                       | 0.91%    | 1.77%      | 0.91%          | 0.91%        | 1.366      | 0.714   | 7.55%  | 1.08%  | 0.77%  | 0.91%    | 17.227     | 0.001   |
| Complexity                 | 36.36%   | 22.03%     | 14.55%         | 18.18%       | 22.431     | <0.001  | 49.06% | 31.18% | 14.18% | 14.50%   | 57.381     | <0.001  |
| Medium Body                | 10.91%   | 10.63%     | 17.73%         | 15.00%       | 7.257      | 0.064   | 18.87% | 17.92% | 12.64% | 9.67%    | 10.286     | 0.016   |
| Firm                       | 9.09%    | 6.58%      | 4.09%          | 8.18%        | 4.201      | 0.241   | 5.66%  | 9.68%  | 5.75%  | 5.14%    | 5.715      | 0.126   |
| Grainy                     | 13.64%   | 12.66%     | 16.82%         | 12.27%       | 2.557      | 0.465   | 13.21% | 14.34% | 17.62% | 10.57%   | 6.166      | 0.104   |
| Astringency                | 19.09%   | 12.15%     | 7.27%          | 11.36%       | 10.134     | 0.017   | 9.43%  | 6.09%  | 8.43%  | 19.94%   | 32.675     | <0.001  |
| Balanced                   | 1.82%    | 3.54%      | 3.64%          | 2.27%        | 1.586      | 0.663   | 1.89%  | 3.58%  | 3.45%  | 2.72%    | 0.729      | 0.866   |
| Grippy                     | 2.73%    | 3.04%      | 1.82%          | 4.09%        | 2.005      | 0.571   | 0.00%  | 1.79%  | 3.45%  | 3.93%    | 4.285      | 0.232   |
| Chewy                      | 9.09%    | 7.09%      | 7.73%          | 4.55%        | 2.985      | 0.394   | 7.55%  | 3.58%  | 4.60%  | 11.78%   | 18.880     | <0.001  |
| Bitterness                 | 2.73%    | 3.54%      | 5.45%          | 3.18%        | 2.289      | 0.515   | 15.09% | 5.38%  | 2.68%  | 1.81%    | 24.248     | <0.001  |
| Full Body                  | 4.55%    | 7.34%      | 6.82%          | 8.18%        | 1.542      | 0.673   | 1.89%  | 9.32%  | 10.73% | 3.63%    | 15.203     | 0.002   |

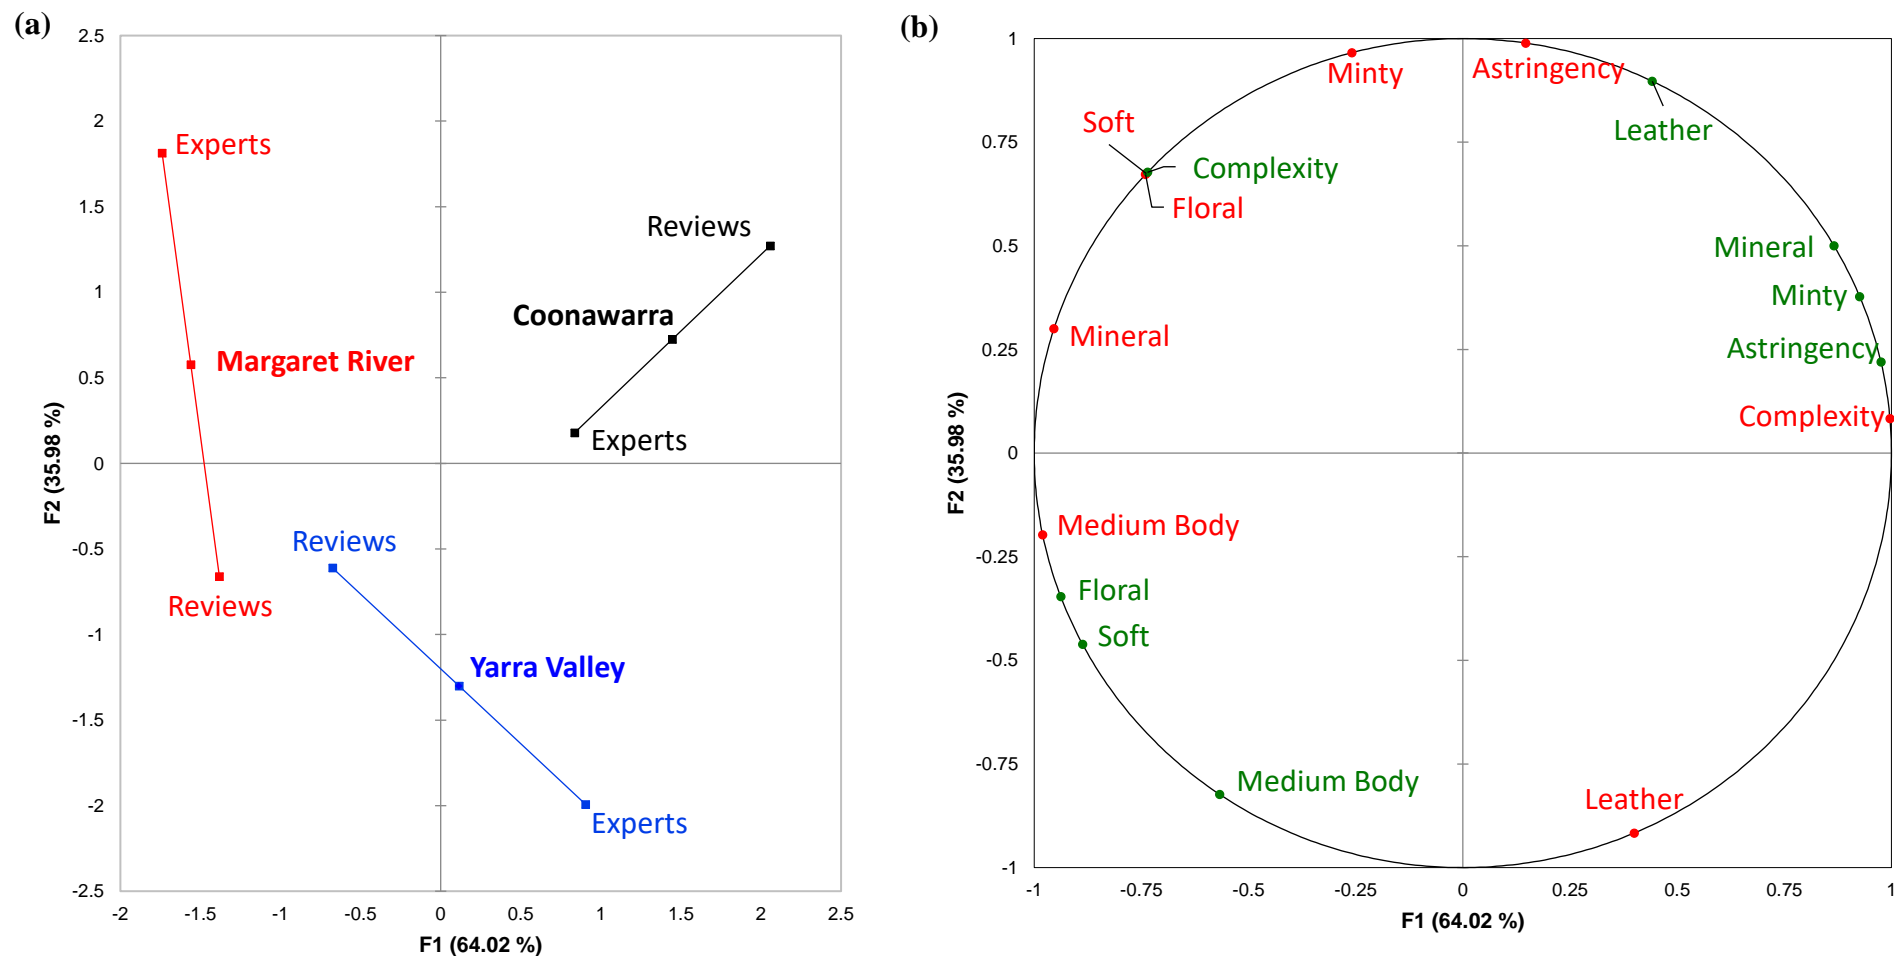

**Figure S1.** Multiple factor analysis plot of Cabernet Sauvignon wines with common significantly different descriptor categories ( $\alpha = 0.1$ , chi-square test) based on the regional profiles showing (a) projected points of the regions according to online reviews and expert panel, where the length of the line is inversely related to the strength of the agreement, and (b) descriptors arising from the online reviews (green) and the expert panel assessments (red).
